# Supplementary material
Source: PubMed Central journal article supplement (PMC2915708)

## Figure legends (Supplemental figures)

### **Figure S1.** Amino acid sequence and genomic structure of *pst-1*

(A) Amino acid sequence alignment of *C. elegans* PST-1b (Ce\_PST-1b/1-440) with human PAPST1 (Hs\_PAPST1/1-432) and *Drosophila* SLALOM (Dm\_SLALOM/1-465). Khaki lines and the red line show the nine predicted transmembrane domains and the missing region, respectively, predicted in *pst-1(tm3364)*. (B) Genomic structure of *pst-1* (*M03F8.2*) and nearby genes. Note the 2 kb scale bar (lower right). (C) The *pst-1* gene intron-exon structures and reporter constructs. The 5'-upstream regions contain the promoters included in the reporter constructs ( $P_{pst-1a}::egfp$  and  $P_{pst-1bc}::egfp$ ). The reporter constructs end at the ATG transcription initiation sequences. The full-length constructs ( $pst-1ab(fl)::egfp$  and  $pst-1c(fl)::egfp$ ) end at the TAA signal for the addition of a polyA tail. Note the 1 kb scale bar (lower right).

### **Figure S2.** Amino acid sequence and genomic structure of *pst-2*

(A) Amino acid sequence alignment of *C. elegans* PST-2a (Ce\_PST-2a/1-364) with human PAPST2 (Hs\_PAPST2/1-401) and *Drosophila* PAPST2 (Dm\_PAPST2/1-396). Khaki lines and the red line show the 10 predicted transmembrane domains and the missing region, respectively, predicted in *pst-2(tm3316)*. (B) Genomic structure of *pst-2* (*F54E7.1*) and nearby genes. Note the 1 kb scale bar (lower right). (C) The *pst-2* intron-exon gene structure and reporter constructs. The 5'-upstream regions contain the promoters included in the reporter constructs ( $P_{pst-2}::egfp$  and  $pst-2b(fl)::egfp$ ). The reporter constructs end at the ATG transcription initiation sequences. The full-length construct ( $pst-2a(fl)::egfp$ ) ends at the TAG stop codon. Note the 0.5 kb scale bar (lower right).

### **Figure S3.** Defects in seam cell maturation and DTC migration in *pst-1(tm3364)* mutant animals.

(A-D) Animals were either wild-type or heterozygous for a *pst-1* deletion; to visualize seam cells, both expressed AJM-1::GFP. (A) In wild-type animals, the seam cells (arrows) were aligned on each side during larval development. (C) They fused to each other and formed two parallel syncytia in the late-L4 to adult stage. (B) In *pst-1(tm3364)* homozygotes, the seam cells were often discontinuous in the L3 to L4 stage. (D) They remained unfused and formed abnormal doughnut-shaped structures in the late- L4 to adult stage (arrowheads). (B and D, bracket) Some seam cells were lost or fused to the hypodermis. GFP signals from vulval cells are indicated with a "V". Note that the *pst-1(tm3364)* young adult has increased intestinal auto-fluorescence. (E) A representative DIC image of a wild-type hermaphrodite gonad. DTC that reached the dorsal side migrated along the dorsal body wall muscle and formed a U-shaped gonadal arm. (F) A representative DIC image of a *pst-1(tm3364)* gonad. The DTC that reached the dorsal side migrated toward the ventral side and formed a P-shaped gonadal arm. (G) Quantification of the DTC migration defects.

**Figure S4.** Subcellular localization of PST-1 and PST-2

Confocal images of (A) anti-GFP antibody staining and (A') anti-DsRed antibody staining in the epidermis of a transgenic worm carrying *P<sub>dpy-7</sub>::pst-1b::egfp* and *P<sub>dpy-7</sub>::aman-2::mCherry* transgene constructs. The epidermis is enclosed in the dashed lines. Confocal images of (B) anti-GFP antibody staining and (B') anti-DsRed antibody staining in the intestine of a transgenic worm carrying *pst-2(fl)::egfp* and *P<sub>aman-2</sub>::aman-2::mCherry* transgene constructs. The intestine is enclosed in the dashed lines. (A'') Merged A and A' images; (B'') Merged B and B' images. The area within the box in A'' and B'' were enlarged for A''' and B'''. Scale bar = 20 mm. (C) Quantitative comparison of the Golgi localization of PST-1 and PST-2. The percentages of co-localization with PST proteins and Golgi marker are shown.

Supplemental Table 1: Primers used for plasmid construction

egfp: enhanced green fluorescent protein;

| Construction                             |         | Primer sequences (5'- 3')                       |
|------------------------------------------|---------|-------------------------------------------------|
| <i>P<sub>pst-1a</sub>::egfp</i>          | Forward | 5'- ACTGTTTCGTGGCAAGATCA -3'                    |
|                                          | Reverse | 5'- CATGATTGCTCTGAATACCTGG -3'                  |
| <i>P<sub>pst-1bc</sub>::egfp</i>         | Forward | Same as <i>P<sub>pst-1a</sub>::egfp</i> Forward |
|                                          | Reverse | 5'- CATTAACCCGTTTCGTGATGTCTC -3'                |
| <i>pst-1ab(fl)::egfp</i>                 | Forward | Same as <i>P<sub>pst-1a</sub>::egfp</i> Forward |
|                                          | Reverse | 5'- CCAACTCCTCTGTGGTCCTC -3'                    |
| <i>pst-1c(fl)::egfp</i>                  | Forward | Same as <i>P<sub>pst-1a</sub>::egfp</i> Forward |
|                                          | Reverse | 5'- ATTTGAGACGAAACGGTTCAG -3'                   |
| <i>P<sub>pst-2a</sub>::egfp</i>          | Forward | 5'- TTGACTCCTTTATTTGCCTGAAA -3'                 |
|                                          | Reverse | 5'- CATTTGAAAGAGTGGGTGGAAAG -3'                 |
| <i>P<sub>pst-2b</sub>::egfp</i>          | Forward | Same as <i>P<sub>pst-2a</sub>::egfp</i> Forward |
|                                          | Reverse | 5'- CATTGTTGCTACTGTGAAAAAGG -3'                 |
| <i>pst-2a(fl)::egfp</i>                  | Forward | Same as <i>P<sub>pst-2a</sub>::egfp</i> Forward |
|                                          | Reverse | 5'- AACCGTCATTGGATCCTTCC -3'                    |
| <i>P<sub>unc-119</sub>::egfp</i>         | Forward | 5'- TGCAATTGTTTTGTGCCAAG -3'                    |
|                                          | Reverse | 5'- CTCTGCCTTCATATATGCTGTTG -3'                 |
| <i>P<sub>rgef-1</sub>::egfp</i>          | Forward | 5'- TGTATGATTCTCGAATGTATTGAA -3'                |
|                                          | Reverse | 5'- GCTCATCGTCGTCGTCGT -3'                      |
| <i>P<sub>dpy-7</sub>::pst-1b::egfp</i>   | Forward | 5'- TGGCGGCCGCGATCCATTGAGCTGGGGT -3'            |
|                                          | Reverse | 5'- TGGCGGCCGCGACCAACTCCTCTGTGGTCCTC -3'        |
| <i>P<sub>dpy-7</sub>::pst-2a::egfp</i>   | Forward | 5'- TGGCGGCCGCGACTGCAGCTCAAATACATTCTG -3'       |
|                                          | Reverse | 5'- TGGCGGCCGCGAAACCGTCATTGGATCCTTCC -3'        |
| <i>P<sub>eft-4</sub>::hPAPST1::Venus</i> | Forward | 5'- TGGGCGGCCGCGATGGACGCCAGATGGTGGGC -3'        |
|                                          | Reverse | 5'- TGGGCGGCCGCGAAACCTTCTGCACAGGAGAC -3'        |
| <i>P<sub>eft-4</sub>::hPAPST2::Venus</i> | Forward | 5'- TGGGCGGCCGCGATGGACTTGACACAGCAAGC -3'        |
|                                          | Reverse | 5'- TGGGCGGCCGCGATACAGTCTGTGCCAGCGTC -3'        |

Supplemental Table 1 (continued): Primers used for plasmid construction

| Construction           |         | Primer sequences (5'-3')                                          |
|------------------------|---------|-------------------------------------------------------------------|
| YEp352GAP-II-pst-1a-HA | Forward | 5'- AAAAAGCAGGCTTCGCCGCCACCATGGATCGGTC<br>AATCATGCCGATTG -3'      |
|                        | Reverse | 5'- AGAAAGCTGGGTACCAACTCCTCTGTGGTCC -3'                           |
| YEp352GAP-II-pst-2-HA  | Forward | 5'- AAAAAGCAGGCTTCGCCGCCACCATGACTGCAG<br>CTCAAATACATTCTGATTGT -3' |
|                        | Reverse | 5'- AGAAAGCTGGGTAAACCGTCATTGGATCCTTCC<br>TAG -3'                  |
| attB adaptive primers  | Forward | 5'- GGGGACAAGTTTGTACAAAAAAGCAGGCT -3'                             |
|                        | Reverse | 5'- GGGGACCACTTTGTACAAGAAAGCTGGGT -3'                             |

# Figure S1

## A

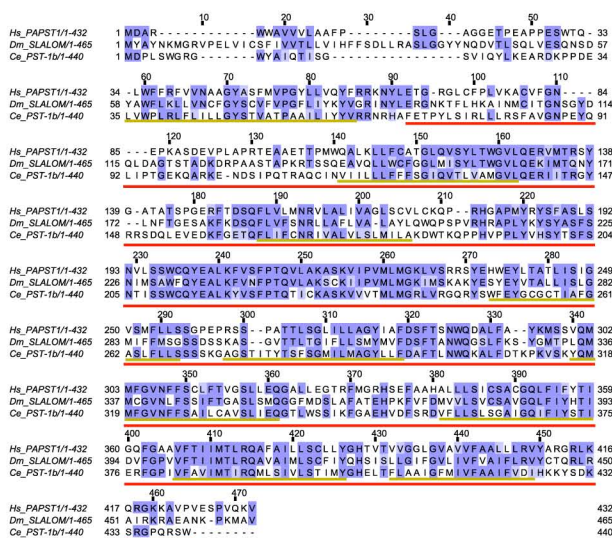

## B

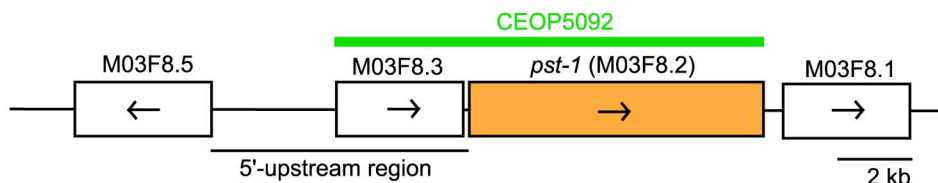

## C

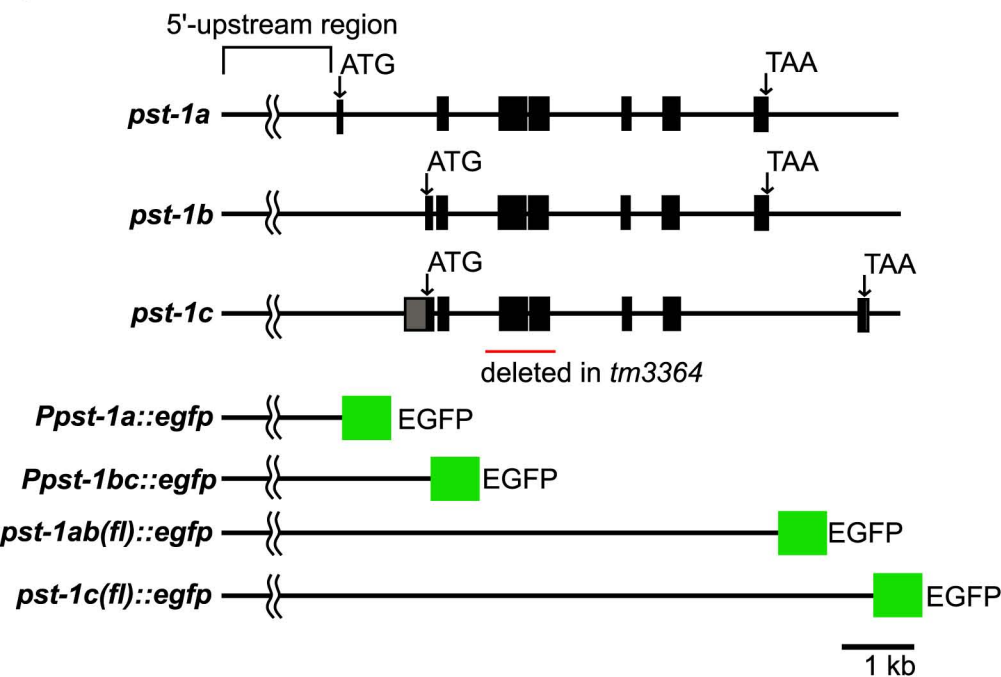

# Figure S2

A

|                 |     |         |     |     |     |                |
|-----------------|-----|---------|-----|-----|-----|----------------|
|                 | 10  | 20      | 30  | 40  | 50  |                |
| Hs_PAPST2/1-401 | 1   | MDLTQQA | KD  | IQ  | N   | 1              |
| Dm_PAPST2/1-396 | 1   | -----   | MY  | DT  | S   | ASSRMTDNKGSVIT |
| Ce_PST-2a/1-364 | 1   | -----   | MT  | AA  | Q   | IHSDCSVHMLPR   |
|                 | 60  | 70      | 80  | 90  | 100 | 110            |
| Hs_PAPST2/1-401 | 58  | H       | I   | K   | S   | WDDVVVL        |
| Dm_PAPST2/1-396 | 39  | T       | S   | E   | S   | PELRI          |
| Ce_PST-2a/1-364 | 19  | V       | K   | E   | D   | EP             |
|                 | 120 | 130     | 140 | 150 | 160 |                |
| Hs_PAPST2/1-401 | 115 | L       | T   | L   | V   | QFAFY          |
| Dm_PAPST2/1-396 | 96  | L       | T   | L   | V   | QFGY           |
| Ce_PST-2a/1-364 | 76  | L       | T   | L   | I   | QFL            |
|                 | 180 | 190     | 200 | 210 | 220 |                |
| Hs_PAPST2/1-401 | 160 | S       | N   | T   | S   | L              |
| Dm_PAPST2/1-396 | 153 | S       | N   | S   | S   | L              |
| Ce_PST-2a/1-364 | 121 | S       | N   | A   | S   | V              |
|                 | 230 | 240     | 250 | 260 | 270 | 280            |
| Hs_PAPST2/1-401 | 217 | D       | S   | T   | T   | A              |
| Dm_PAPST2/1-396 | 210 | D       | S   | Q   | M   | T              |
| Ce_PST-2a/1-364 | 178 | D       | N   | K   | V   | S              |
|                 | 290 | 300     | 310 | 320 | 330 | 340            |
| Hs_PAPST2/1-401 | 274 | L       | G   | L   | T   | C              |
| Dm_PAPST2/1-396 | 267 | V       | I   | M   | L   | V              |
| Ce_PST-2a/1-364 | 235 | A       | F   | V   | L   | S              |
|                 | 350 | 360     | 370 | 380 | 390 |                |
| Hs_PAPST2/1-401 | 331 | T       | G   | R   | K   | A              |
| Dm_PAPST2/1-396 | 324 | T       | A   | R   | K   | A              |
| Ce_PST-2a/1-364 | 292 | T       | L   | R   | K   | A              |
|                 | 400 | 410     |     |     |     |                |
| Hs_PAPST2/1-401 | 388 | S       | -   | -   | -   | Y              |
| Dm_PAPST2/1-396 | 380 | F       | G   | A   | K   | V              |
| Ce_PST-2a/1-364 | 348 | A       | M   | G   | Y   | H              |

B

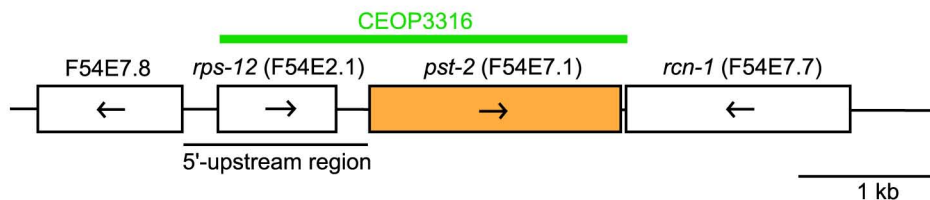

C

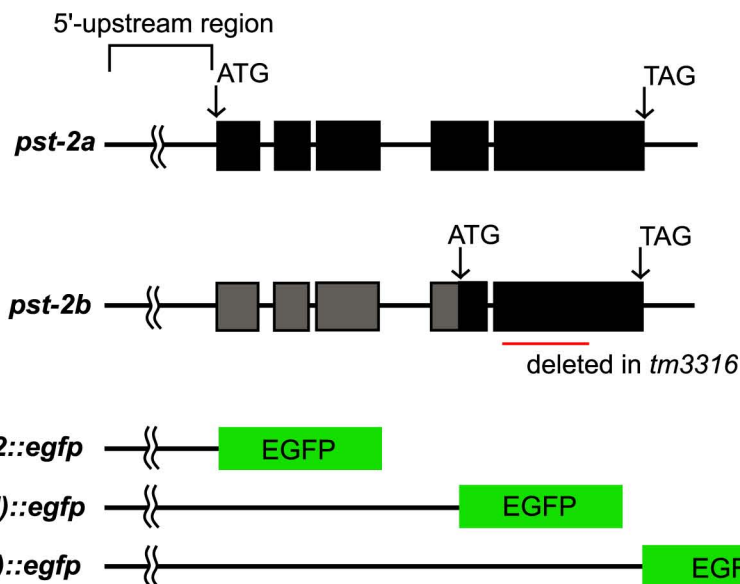

# Figure S3

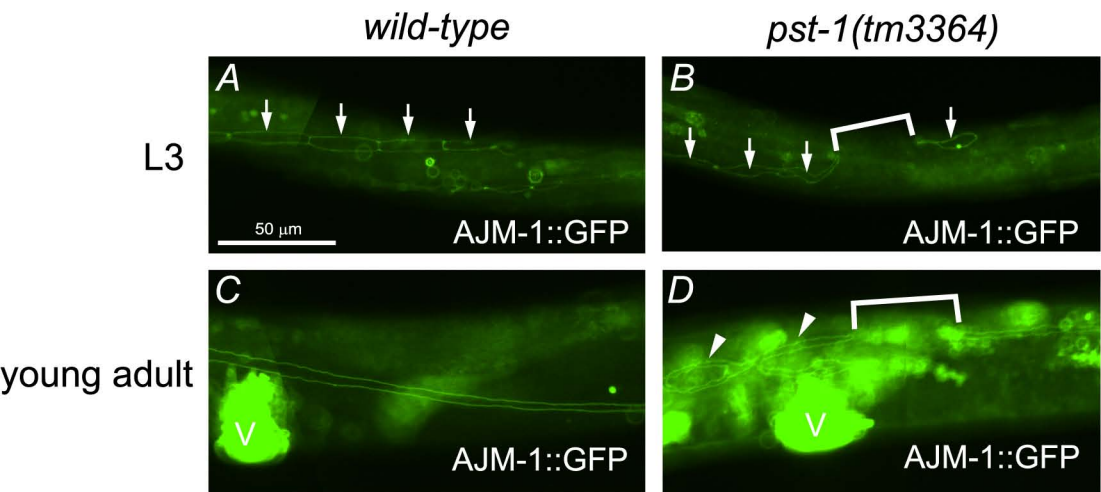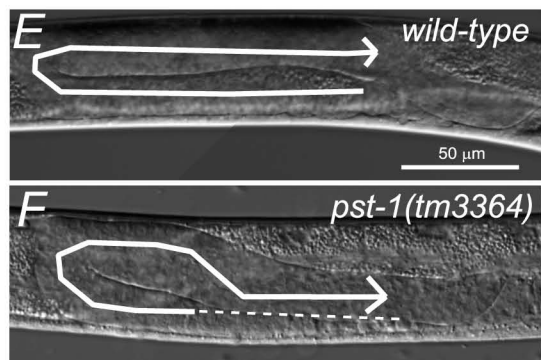

G

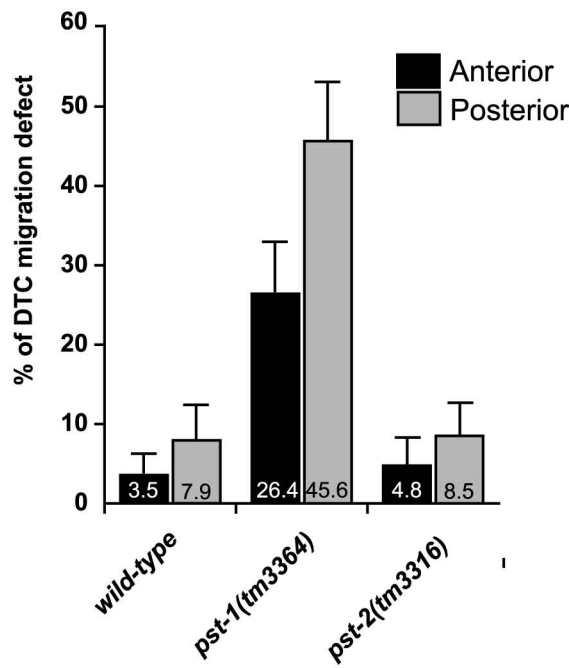

# Figure S4

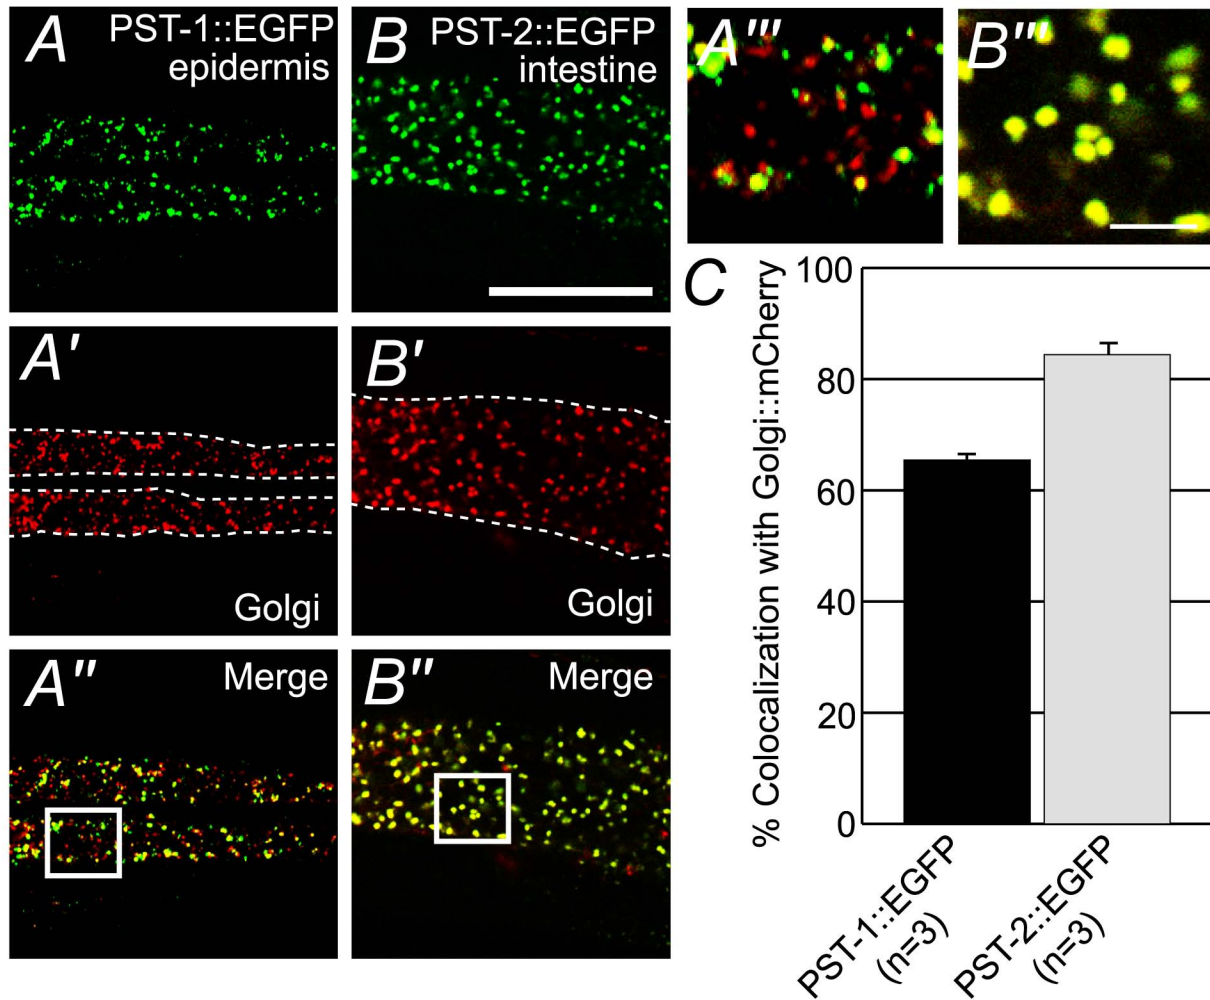

Supplement: supp_M109.088229_jbc.M109.088229-1.pdf [file supp_M109.088229_jbc.M109.088229-1.pdf]
